# Supplementary material for: Influenza A viruses use multivalent sialic acid clusters for cell binding and receptor activation
Source: PubMed Central journal article supplement (PMC7371231; doi:10.1371/journal.ppat.1008656), 2020-07-08

**A**                      confocal                      STED

SNA

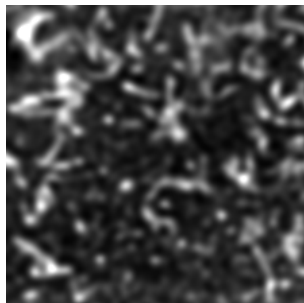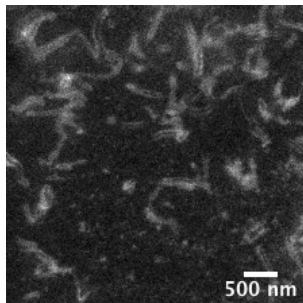

**B**

SNA, MDCK cells

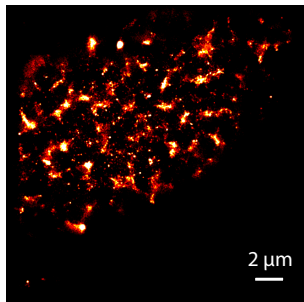

**C**

WGA, A549 cells

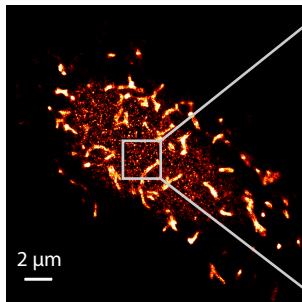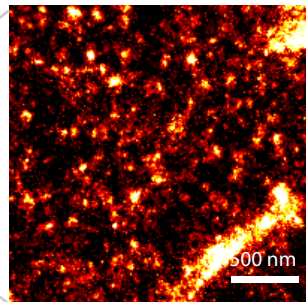

Supplement: ppat.1008656.s004.pdf [file ppat.1008656.s004.pdf]
