# Supplementary material for: Influenza A viruses use multivalent sialic acid clusters for cell binding and receptor activation
Source: PubMed Central journal article supplement (PMC7371231; doi:10.1371/journal.ppat.1008656), 2020-07-08

*STORM*

**A**

*Ezrin*

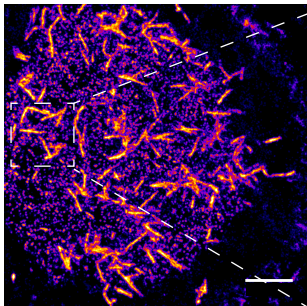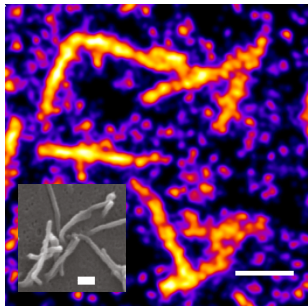

**B**

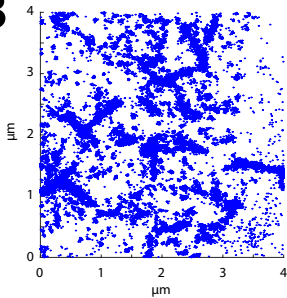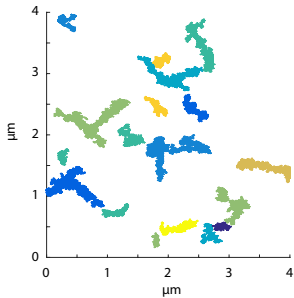

Supplement: ppat.1008656.s005.pdf [file ppat.1008656.s005.pdf]
