# Supplementary material for: Influenza A viruses use multivalent sialic acid clusters for cell binding and receptor activation
Source: PubMed Central journal article supplement (PMC7371231; doi:10.1371/journal.ppat.1008656), 2020-07-08

**A**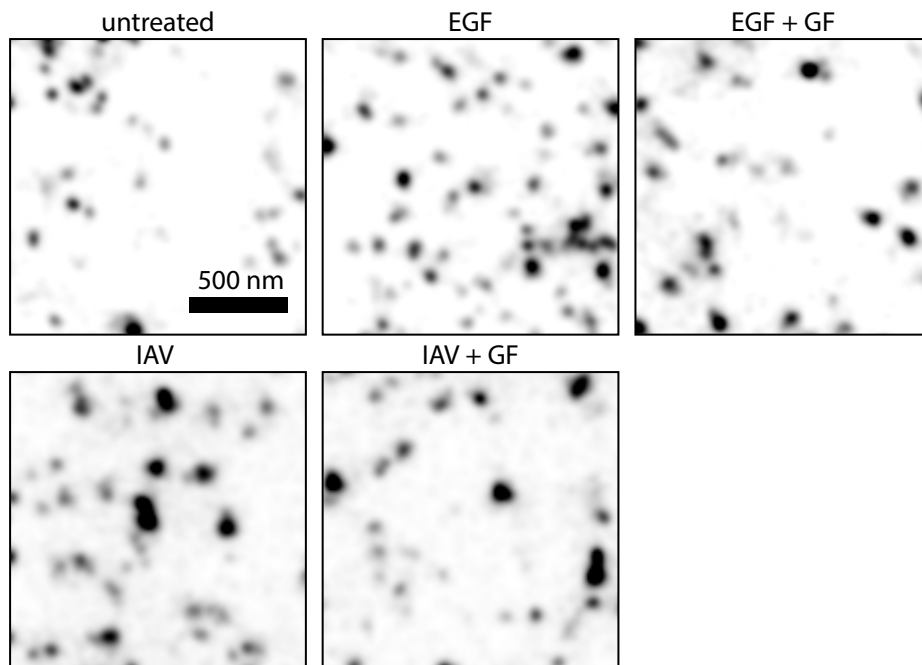**B**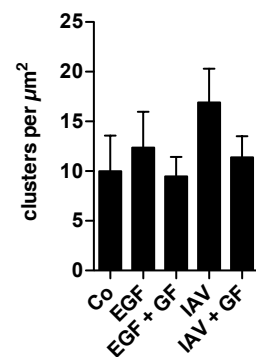**C**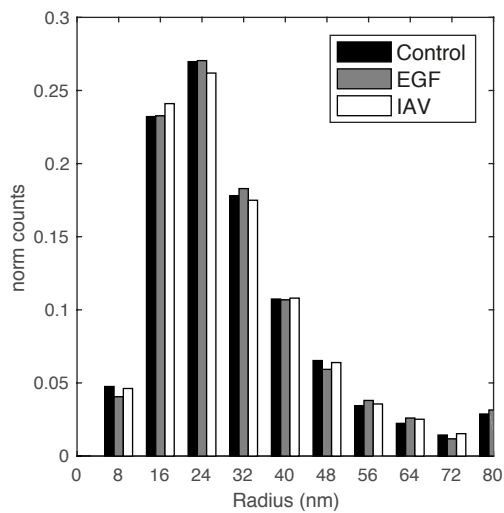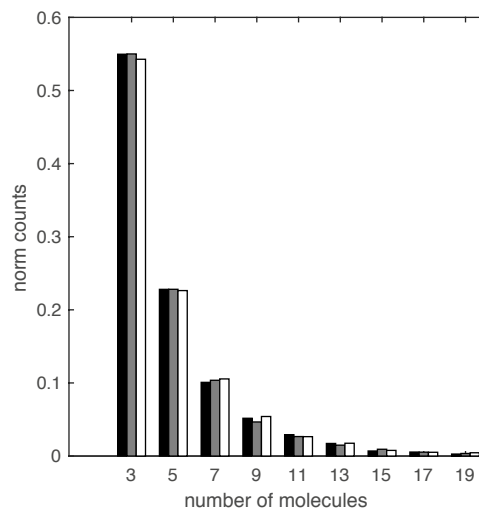

Supplement: ppat.1008656.s015.pdf [file ppat.1008656.s015.pdf]
